# Supplementary material for: Genome-wide analysis of long non-coding RNAs (lncRNAs) in two contrasting soybean genotypes subjected to phosphate starvation
Source: BMC Genomics. 2021 Jun 9;22:433. doi: 10.1186/s12864-021-07750-8 (PMC8191232; doi:10.1186/s12864-021-07750-8)
Supplement: Supplementary file 6 — Additional file 6: Table S5. KEGG pathway annotation of the predicted target mRNAs of DE lncRNAs in two comparisons. [file 12864_2021_7750_MOESM6_ESM.xlsx]

## Sheet: Sheet1
Table S5. KEGG pathway annotation of the predicted target mRNAs of DE lncRNAs in two comparisons.
Type	KEGG_A_class	KEGG_B_class	Pathway	all	All (22299)	Pvalue	Qvalue	Pathway ID	Genes	K_IDs
different genotypes same P lelvel	Organismal Systems	Environmental adaptation	Circadian rhythm - plant	7	325	0.00340951	0.183381	ko04712	TCONS_00033232;Glyma.08G109200.1;Glyma.08G109300.1;Glyma.08G109400.1;Glyma.08G109500.1;Glyma.10G141400.2;Glyma.19G224700.1	K10143+K00660+K00660+K00660+K00660+K12120+K12126
different genotypes same P lelvel	Metabolism	Carbohydrate metabolism	Pyruvate metabolism	8	440	0.00495624	0.183381	ko00620	Glyma.01G097400.1;Glyma.01G097400.3;Glyma.06G105900.1;Glyma.06G105900.2;Glyma.06G105900.3;Glyma.06G105900.4;Glyma.09G126300.1;Glyma.19G190100.2	K01610+K01610+K11262+K11262+K11262+K11262+K00873+K00873
different genotypes same P lelvel	Metabolism	Carbohydrate metabolism	Propanoate metabolism	4	150	0.0125505	0.237498	ko00640	Glyma.06G105900.1;Glyma.06G105900.2;Glyma.06G105900.3;Glyma.06G105900.4	K11262+K11262+K11262+K11262
different genotypes same P lelvel	Organismal Systems	Environmental adaptation	Plant-pathogen interaction	11	849	0.0128377	0.237498	ko04626	TCONS_00098343;Glyma.10G216900.1;Glyma.10G217000.2;Glyma.13G035100.1;Glyma.18G084000.5;Glyma.18G084400.1;Glyma.19G140800.1;Glyma.20G224300.2;Glyma.20G224300.3;Glyma.20G224300.4;Glyma.20G224300.5	K13457+K13412+K13412+K13448+K13457+K13457+K13412+K02183+K02183+K02183+K02183
different genotypes same P lelvel	Metabolism	Biosynthesis of other secondary metabolites	Flavonoid biosynthesis	4	164	0.0168935	0.250024	ko00941	Glyma.08G109200.1;Glyma.08G109300.1;Glyma.08G109400.1;Glyma.08G109500.1	K00660+K00660+K00660+K00660
different genotypes same P lelvel	Metabolism	Lipid metabolism	Fatty acid biosynthesis	4	191	0.0276707	0.341272	ko00061	Glyma.06G105900.1;Glyma.06G105900.2;Glyma.06G105900.3;Glyma.06G105900.4	K11262+K11262+K11262+K11262
different genotypes same P lelvel	Environmental Information Processing	Signal transduction	Phosphatidylinositol signaling system	6	398	0.0322933	0.341386	ko04070	Glyma.02G226800.1;Glyma.07G216600.1;Glyma.20G224300.2;Glyma.20G224300.3;Glyma.20G224300.4;Glyma.20G224300.5	K05857+K00921+K02183+K02183+K02183+K02183
different genotypes same P lelvel	Metabolism	Lipid metabolism	alpha-Linolenic acid metabolism	4	215	0.0400455	0.343714	ko00592	TCONS_00099880;Glyma.06G122600.1;Glyma.06G122600.2;Glyma.06G122600.4	K08241+K18857+K18857+K18857
different genotypes same P lelvel	Metabolism	Biosynthesis of other secondary metabolites	Isoflavonoid biosynthesis	2	57	0.0455352	0.343714	ko00943	Glyma.03G143700.1;Glyma.18G220500.1	K13261+K13265
different genotypes same P lelvel	Genetic Information Processing	Translation	Ribosome	11	1048	0.0490079	0.343714	ko03010	TCONS_00068360;TCONS_00074826;Glyma.03G103100.1;Glyma.03G166700.1;Glyma.07G114900.1;Glyma.10G216700.1;Glyma.10G216700.2;Glyma.11G003600.2;Glyma.11G048100.1;Glyma.19G203300.1;Glyma.20G168100.1	K02940+K02870+K02998+K02894+K02926+K02888+K02888+K02957+K02898+K02979+K02925
different genotypes same P lelvel	Metabolism	Carbohydrate metabolism	Pentose phosphate pathway	4	233	0.0510926	0.343714	ko00030	TCONS_00034157;Glyma.07G013800.1;Glyma.14G162000.1;Glyma.18G284600.2	K00036+K00036+K01057+K00036
different genotypes same P lelvel	Metabolism	Carbohydrate metabolism	Glycolysis / Gluconeogenesis	7	598	0.067299	0.386468	ko00010	Glyma.01G097400.1;Glyma.01G097400.3;Glyma.06G122600.1;Glyma.06G122600.2;Glyma.06G122600.4;Glyma.09G126300.1;Glyma.19G190100.2	K01610+K01610+K18857+K18857+K18857+K00873+K00873
different genotypes same P lelvel	Cellular Processes	Transport and catabolism	Endocytosis	9	849	0.0678931	0.386468	ko04144	TCONS_00099721;Glyma.02G294200.1;Glyma.02G294200.2;Glyma.04G200800.1;Glyma.09G030900.1;Glyma.09G030900.2;Glyma.11G078200.1;Glyma.19G202100.1;Glyma.20G124000.1	K18442+K12483+K12483+K12489+K07937+K07937+K19366+K12492+K12200
different genotypes same P lelvel	Metabolism	Biosynthesis of other secondary metabolites	Phenylpropanoid biosynthesis	7	627	0.0818227	0.432491	ko00940	Glyma.01G114500.3;Glyma.01G114500.5;Glyma.02G234200.1;Glyma.09G284700.1;Glyma.11G129700.1;Glyma.15G001700.1;Glyma.18G177000.1	K05350+K05350+K00430+K00430+K01188+K01904+K00083
different genotypes same P lelvel	Metabolism	Carbohydrate metabolism	Ascorbate and aldarate metabolism	3	195	0.111286	0.54901	ko00053	Glyma.07G013900.4;Glyma.20G224400.4;Glyma.20G224400.5	K00469+K10046+K10046
different genotypes same P lelvel	Human Diseases	Endocrine and metabolic diseases	AGE-RAGE signaling pathway in diabetic complications	2	100	0.120028	0.555129	ko04933	Glyma.02G226800.1;Glyma.12G120600.1	K05857+K04392
different genotypes same P lelvel	Metabolism	Global and Overview	Fatty acid metabolism	4	328	0.13315	0.579596	ko01212	Glyma.06G105900.1;Glyma.06G105900.2;Glyma.06G105900.3;Glyma.06G105900.4	K11262+K11262+K11262+K11262
different genotypes same P lelvel	Metabolism	Carbohydrate metabolism	Amino sugar and nucleotide sugar metabolism	6	593	0.144033	0.583701	ko00520	TCONS_00077191;Glyma.09G266500.1;Glyma.18G120700.1;Glyma.19G076200.1;Glyma.20G224400.4;Glyma.20G224400.5	K01183+K13648+K01183+K01183+K10046+K10046
different genotypes same P lelvel	Metabolism	Lipid metabolism	Sphingolipid metabolism	2	119	0.158622	0.583701	ko00600	Glyma.15G072800.1;Glyma.19G204500.1	K04712+K04716
different genotypes same P lelvel	Metabolism	Carbohydrate metabolism	Inositol phosphate metabolism	4	359	0.16736	0.583701	ko00562	Glyma.02G226600.1;Glyma.02G226800.1;Glyma.07G013900.4;Glyma.07G216600.1	K19517+K05857+K00469+K00921
different genotypes same P lelvel	Metabolism	Metabolism of other amino acids	Cyanoamino acid metabolism	3	245	0.180345	0.583701	ko00460	Glyma.01G114500.3;Glyma.01G114500.5;Glyma.11G129700.1	K05350+K05350+K01188
different genotypes same P lelvel	Metabolism	Lipid metabolism	Fatty acid degradation	3	248	0.184812	0.583701	ko00071	Glyma.06G122600.1;Glyma.06G122600.2;Glyma.06G122600.4	K18857+K18857+K18857
different genotypes same P lelvel	Metabolism	Amino acid metabolism	Tyrosine metabolism	3	248	0.184812	0.583701	ko00350	Glyma.06G122600.1;Glyma.06G122600.2;Glyma.06G122600.4	K18857+K18857+K18857
different genotypes same P lelvel	Metabolism	Carbohydrate metabolism	Citrate cycle (TCA cycle)	3	251	0.189309	0.583701	ko00020	Glyma.01G097400.1;Glyma.01G097400.3;Glyma.15G267000.1	K01610+K01610+K01648
different genotypes same P lelvel	Metabolism	Metabolism of terpenoids and polyketides	Brassinosteroid biosynthesis	1	45	0.236214	0.673434	ko00905	Glyma.05G010200.1	K15639
different genotypes same P lelvel	Metabolism	Energy metabolism	Nitrogen metabolism	2	159	0.245109	0.673434	ko00910	Glyma.06G182700.1;Glyma.16G061000.1	K01673+K01674
different genotypes same P lelvel	Metabolism	Carbohydrate metabolism	Starch and sucrose metabolism	8	998	0.245712	0.673434	ko00500	TCONS_00091411;Glyma.01G114500.3;Glyma.01G114500.5;Glyma.09G266500.1;Glyma.10G141200.1;Glyma.10G150700.1;Glyma.11G129700.1;Glyma.15G001800.1	K16055+K05350+K05350+K13648+K00705+K01051+K01188+K01051
different genotypes same P lelvel	Metabolism	Metabolism of cofactors and vitamins	Vitamin B6 metabolism	1	52	0.267604	0.70724	ko00750	Glyma.11G218700.3	K00868
different genotypes same P lelvel	Metabolism	Metabolism of terpenoids and polyketides	Sesquiterpenoid and triterpenoid biosynthesis	1	56	0.284963	0.727147	ko00909	Glyma.U038300.1	K00511
different genotypes same P lelvel	Metabolism	Amino acid metabolism	Lysine biosynthesis	1	61	0.306088	0.72746	ko00300	Glyma.19G174300.1	K01778
different genotypes same P lelvel	Genetic Information Processing	Folding, sorting and degradation	SNARE interactions in vesicular transport	2	191	0.315655	0.72746	ko04130	Glyma.14G035500.1;Glyma.17G199500.1	K08515+K08492
different genotypes same P lelvel	Genetic Information Processing	Folding, sorting and degradation	Protein export	2	194	0.322222	0.72746	ko03060	Glyma.08G038100.1;Glyma.15G006700.1	K03100+K03106
different genotypes same P lelvel	Metabolism	Lipid metabolism	Steroid biosynthesis	2	195	0.324408	0.72746	ko00100	Glyma.20G127800.2;Glyma.U038300.1	K01052+K00511
different genotypes same P lelvel	Metabolism	Metabolism of other amino acids	Taurine and hypotaurine metabolism	1	71	0.346498	0.739227	ko00430	Glyma.14G176800.1	K10712
different genotypes same P lelvel	Metabolism	Nucleotide metabolism	Purine metabolism	6	813	0.356957	0.739227	ko00230	TCONS_00012122;Glyma.09G126300.1;Glyma.15G072900.1;Glyma.18G157400.1;Glyma.19G190100.2;Glyma.20G019200.1	K01514+K00873+K01466+K02324+K00873+K03011
different genotypes same P lelvel	Metabolism	Metabolism of other amino acids	Glutathione metabolism	3	362	0.366764	0.739227	ko00480	TCONS_00034157;Glyma.07G013800.1;Glyma.18G284600.2	K00036+K00036+K00036
different genotypes same P lelvel	Metabolism	Glycan biosynthesis and metabolism	Other glycan degradation	1	77	0.369614	0.739227	ko00511	Glyma.04G200900.1	K01191
different genotypes same P lelvel	Metabolism	Metabolism of cofactors and vitamins	Ubiquinone and other terpenoid-quinone biosynthesis	2	233	0.40571	0.76486	ko00130	Glyma.01G000100.1;Glyma.15G001700.1	K14759+K01904
different genotypes same P lelvel	Cellular Processes	Transport and catabolism	Phagosome	3	387	0.407084	0.76486	ko04145	Glyma.07G216600.1;Glyma.12G120600.1;Glyma.17G199500.1	K00921+K04392+K08492
different genotypes same P lelvel	Metabolism	Lipid metabolism	Fatty acid elongation	1	89	0.413438	0.76486	ko00062	Glyma.18G232000.1	K01068
different genotypes same P lelvel	Human Diseases	Endocrine and metabolic diseases	Insulin resistance	2	245	0.430454	0.770354	ko04931	Glyma.10G006800.1;Glyma.10G006800.2	K06269+K06269
different genotypes same P lelvel	Metabolism	Amino acid metabolism	Valine, leucine and isoleucine biosynthesis	1	99	0.447638	0.770354	ko00290	Glyma.07G168700.1	K00826
different genotypes same P lelvel	Metabolism	Metabolism of terpenoids and polyketides	Diterpenoid biosynthesis	1	99	0.447638	0.770354	ko00904	Glyma.02G010100.1	K04125
different genotypes same P lelvel	Genetic Information Processing	Translation	Aminoacyl-tRNA biosynthesis	2	272	0.484059	0.809425	ko00970	TCONS_00078856;TCONS_00100919	K01881+K01873
different genotypes same P lelvel	Metabolism	Metabolism of cofactors and vitamins	Folate biosynthesis	1	113	0.492218	0.809425	ko00790	Glyma.10G105400.2	K01930
different genotypes same P lelvel	Metabolism	Global and Overview	Carbon metabolism	8	1304	0.519261	0.83511	ko01200	TCONS_00034157;Glyma.01G097400.1;Glyma.01G097400.3;Glyma.07G013800.1;Glyma.09G126300.1;Glyma.14G162000.1;Glyma.18G284600.2;Glyma.19G190100.2	K00036+K01610+K01610+K00036+K00873+K01057+K00036+K00873
different genotypes same P lelvel	Metabolism	Lipid metabolism	Biosynthesis of unsaturated fatty acids	1	126	0.530408	0.83511	ko01040	Glyma.18G232000.1	K01068
different genotypes same P lelvel	Metabolism	Energy metabolism	Carbon fixation in photosynthetic organisms	2	330	0.588107	0.906665	ko00710	Glyma.01G097400.1;Glyma.01G097400.3	K01610+K01610
different genotypes same P lelvel	Metabolism	Carbohydrate metabolism	Pentose and glucuronate interconversions	2	339	0.602805	0.910358	ko00040	Glyma.10G150700.1;Glyma.15G001800.1	K01051+K01051
different genotypes same P lelvel	Genetic Information Processing	Folding, sorting and degradation	Ubiquitin mediated proteolysis	4	712	0.61755	0.913974	ko04120	TCONS_00033232;Glyma.04G242700.1;Glyma.08G129900.1;Glyma.19G181100.1	K10143+K03875+K10610+K10604
different genotypes same P lelvel	Metabolism	Metabolism of cofactors and vitamins	Pantothenate and CoA biosynthesis	1	174	0.648302	0.915652	ko00770	Glyma.07G168700.1	K00826
different genotypes same P lelvel	Metabolism	Energy metabolism	Photosynthesis	1	188	0.676779	0.915652	ko00195	Glyma.16G143600.1	K02716
different genotypes same P lelvel	Genetic Information Processing	Transcription	RNA polymerase	1	192	0.684487	0.915652	ko03020	Glyma.20G019200.1	K03011
different genotypes same P lelvel	Metabolism	Amino acid metabolism	Phenylalanine metabolism	1	196	0.692012	0.915652	ko00360	Glyma.15G001700.1	K01904
different genotypes same P lelvel	Metabolism	Nucleotide metabolism	Pyrimidine metabolism	3	627	0.726195	0.915652	ko00240	Glyma.07G129300.1;Glyma.18G157400.1;Glyma.20G019200.1	K01489+K02324+K03011
different genotypes same P lelvel	Genetic Information Processing	Folding, sorting and degradation	Proteasome	1	220	0.733564	0.915652	ko03050	Glyma.13G031200.1	K02735
different genotypes same P lelvel	Genetic Information Processing	Replication and repair	Base excision repair	1	226	0.743051	0.915652	ko03410	Glyma.18G157400.1	K02324
different genotypes same P lelvel	Genetic Information Processing	Replication and repair	Nucleotide excision repair	2	457	0.760068	0.915652	ko03420	Glyma.08G129900.1;Glyma.18G157400.1	K10610+K02324
different genotypes same P lelvel	Genetic Information Processing	Translation	mRNA surveillance pathway	3	664	0.761317	0.915652	ko03015	Glyma.07G250200.1;Glyma.10G006800.1;Glyma.10G006800.2	K11583+K06269+K06269
different genotypes same P lelvel	Metabolism	Metabolism of terpenoids and polyketides	Terpenoid backbone biosynthesis	1	239	0.762471	0.915652	ko00900	Glyma.09G122500.1	K12742
different genotypes same P lelvel	Metabolism	Amino acid metabolism	Phenylalanine, tyrosine and tryptophan biosynthesis	1	247	0.77369	0.915652	ko00400	Glyma.05G183700.2	K00891
different genotypes same P lelvel	Metabolism	Amino acid metabolism	Valine, leucine and isoleucine degradation	1	256	0.785685	0.915652	ko00280	Glyma.07G168700.1	K00826
different genotypes same P lelvel	Metabolism	Energy metabolism	Oxidative phosphorylation	2	485	0.788473	0.915652	ko00190	Glyma.11G091800.2;Glyma.17G063400.1	K03939+K05577
different genotypes same P lelvel	Genetic Information Processing	Transcription	Spliceosome	4	914	0.799496	0.915652	ko03040	TCONS_00011929;Glyma.03G047800.1;Glyma.09G001000.1;Glyma.19G250800.1	K12874+K12874+K12831+K11091
different genotypes same P lelvel	Metabolism	Global and Overview	2-Oxocarboxylic acid metabolism	1	271	0.804289	0.915652	ko01210	Glyma.07G168700.1	K00826
different genotypes same P lelvel	Genetic Information Processing	Translation	RNA transport	3	735	0.818538	0.917755	ko03013	TCONS_00038151;TCONS_00038152;Glyma.19G250600.1	K14309+K14309+K05749
different genotypes same P lelvel	Metabolism	Global and Overview	Biosynthesis of amino acids	5	1191	0.844412	0.932634	ko01230	Glyma.05G183700.2;Glyma.07G168700.1;Glyma.09G126300.1;Glyma.19G174300.1;Glyma.19G190100.2	K00891+K00826+K00873+K01778+K00873
different genotypes same P lelvel	Genetic Information Processing	Replication and repair	DNA replication	1	374	0.895267	0.974261	ko03030	Glyma.18G157400.1	K02324
different genotypes same P lelvel	Genetic Information Processing	Translation	Ribosome biogenesis in eukaryotes	1	440	0.929949	0.981165	ko03008	TCONS_00026698	K14521
different genotypes same P lelvel	Cellular Processes	Transport and catabolism	Peroxisome	1	453	0.935293	0.981165	ko04146	Glyma.06G289700.1	K13348
different genotypes same P lelvel	Metabolism	Amino acid metabolism	Cysteine and methionine metabolism	1	505	0.952915	0.981165	ko00270	Glyma.07G168700.1	K00826
different genotypes same P lelvel	Genetic Information Processing	Folding, sorting and degradation	Protein processing in endoplasmic reticulum	2	940	0.977973	0.981165	ko04141	Glyma.09G001100.1;Glyma.13G028900.1	K10666+K10950
different genotypes same P lelvel	Genetic Information Processing	Folding, sorting and degradation	RNA degradation	1	632	0.978409	0.981165	ko03018	Glyma.08G236700.1	K12617
different genotypes same P lelvel	Environmental Information Processing	Signal transduction	Plant hormone signal transduction	4	1499	0.981165	0.981165	ko04075	Glyma.08G307500.1;Glyma.10G007000.1;Glyma.19G163900.1;Glyma.19G224700.1	K14488+K14516+K14516+K12126
different P levels same genotypes	Metabolism	Carbohydrate metabolism	Propanoate metabolism	6	150	1.32186e-06	5.5518e-05	ko00640	Glyma.06G105900.1;Glyma.06G105900.2;Glyma.06G105900.3;Glyma.06G105900.4;Glyma.19G107300.1;Glyma.19G107300.2	K11262+K11262+K11262+K11262+K01895+K01895
different P levels same genotypes	Metabolism	Carbohydrate metabolism	Glycolysis / Gluconeogenesis	8	598	6.78868e-05	0.000966298	ko00010	Glyma.02G222400.1;Glyma.06G122600.1;Glyma.06G122600.2;Glyma.06G122600.4;Glyma.13G231700.1;Glyma.19G107300.1;Glyma.19G107300.2;Glyma.19G190100.2	K01623+K18857+K18857+K18857+K01568+K01895+K01895+K00873
different P levels same genotypes	Metabolism	Carbohydrate metabolism	Pyruvate metabolism	7	440	6.90213e-05	0.000966298	ko00620	Glyma.06G105900.1;Glyma.06G105900.2;Glyma.06G105900.3;Glyma.06G105900.4;Glyma.19G107300.1;Glyma.19G107300.2;Glyma.19G190100.2	K11262+K11262+K11262+K11262+K01895+K01895+K00873
different P levels same genotypes	Metabolism	Carbohydrate metabolism	Starch and sucrose metabolism	9	998	0.000450959	0.00473507	ko00500	Glyma.02G008300.1;Glyma.10G141200.1;Glyma.12G051800.1;Glyma.12G051800.2;Glyma.15G182600.1;Glyma.15G182600.2;Glyma.17G069600.1;Glyma.19G212600.1;Glyma.19G212800.2	K01051+K00705+K00847+K00847+K00695+K00695+K08679+K01051+K00695
different P levels same genotypes	Metabolism	Lipid metabolism	Fatty acid biosynthesis	4	191	0.00102422	0.00860343	ko00061	Glyma.06G105900.1;Glyma.06G105900.2;Glyma.06G105900.3;Glyma.06G105900.4	K11262+K11262+K11262+K11262
different P levels same genotypes	Metabolism	Global and Overview	Fatty acid metabolism	4	328	0.00714462	0.0500123	ko01212	Glyma.06G105900.1;Glyma.06G105900.2;Glyma.06G105900.3;Glyma.06G105900.4	K11262+K11262+K11262+K11262
different P levels same genotypes	Metabolism	Lipid metabolism	alpha-Linolenic acid metabolism	3	215	0.0138102	0.082861	ko00592	Glyma.06G122600.1;Glyma.06G122600.2;Glyma.06G122600.4	K18857+K18857+K18857
different P levels same genotypes	Metabolism	Carbohydrate metabolism	Pentose phosphate pathway	3	233	0.0170906	0.0845462	ko00030	TCONS_00034157;Glyma.02G222400.1;Glyma.07G013800.1	K00036+K01623+K00036
different P levels same genotypes	Metabolism	Lipid metabolism	Fatty acid degradation	3	248	0.0201301	0.0845462	ko00071	Glyma.06G122600.1;Glyma.06G122600.2;Glyma.06G122600.4	K18857+K18857+K18857
different P levels same genotypes	Metabolism	Amino acid metabolism	Tyrosine metabolism	3	248	0.0201301	0.0845462	ko00350	Glyma.06G122600.1;Glyma.06G122600.2;Glyma.06G122600.4	K18857+K18857+K18857
different P levels same genotypes	Metabolism	Carbohydrate metabolism	Fructose and mannose metabolism	3	272	0.0255758	0.0976531	ko00051	Glyma.02G222400.1;Glyma.12G051800.1;Glyma.12G051800.2	K01623+K00847+K00847
different P levels same genotypes	Metabolism	Metabolism of cofactors and vitamins	Nicotinate and nicotinamide metabolism	2	133	0.0385631	0.134971	ko00760	Glyma.19G193700.1;Glyma.19G193700.2	K01240+K01240
different P levels same genotypes	Metabolism	Carbohydrate metabolism	Amino sugar and nucleotide sugar metabolism	4	593	0.0491876	0.158914	ko00520	Glyma.05G217100.1;Glyma.12G051800.1;Glyma.12G051800.2;Glyma.17G069600.1	K01784+K00847+K00847+K08679
different P levels same genotypes	Metabolism	Global and Overview	Carbon metabolism	6	1304	0.0816997	0.245099	ko01200	TCONS_00034157;Glyma.02G222400.1;Glyma.07G013800.1;Glyma.19G107300.1;Glyma.19G107300.2;Glyma.19G190100.2	K00036+K01623+K00036+K01895+K01895+K00873
different P levels same genotypes	Human Diseases	Endocrine and metabolic diseases	Insulin resistance	2	245	0.111615	0.312522	ko04931	Glyma.10G006800.1;Glyma.10G006800.2	K06269+K06269
different P levels same genotypes	Metabolism	Amino acid metabolism	Lysine biosynthesis	1	61	0.132905	0.344701	ko00300	Glyma.19G174300.1	K01778
different P levels same genotypes	Genetic Information Processing	Transcription	Basal transcription factors	2	281	0.139522	0.344701	ko03022	Glyma.19G111200.1;Glyma.19G111200.2	K03120+K03120
different P levels same genotypes	Metabolism	Metabolism of other amino acids	Taurine and hypotaurine metabolism	1	71	0.152973	0.356936	ko00430	Glyma.14G176800.1	K10712
different P levels same genotypes	Metabolism	Carbohydrate metabolism	Pentose and glucuronate interconversions	2	339	0.187126	0.41323	ko00040	Glyma.02G008300.1;Glyma.19G212600.1	K01051+K01051
different P levels same genotypes	Metabolism	Carbohydrate metabolism	Inositol phosphate metabolism	2	359	0.204059	0.41323	ko00562	Glyma.07G013900.4;Glyma.16G013500.1	K00469+K00921
different P levels same genotypes	Metabolism	Metabolism of other amino acids	Glutathione metabolism	2	362	0.206615	0.41323	ko00480	TCONS_00034157;Glyma.07G013800.1	K00036+K00036
different P levels same genotypes	Metabolism	Lipid metabolism	Sphingolipid metabolism	1	119	0.24313	0.464158	ko00600	Glyma.19G204500.1	K04716
different P levels same genotypes	Cellular Processes	Transport and catabolism	Endocytosis	3	849	0.317701	0.58015	ko04144	TCONS_00099721;Glyma.11G078200.1;Glyma.20G124000.1	K18442+K19366+K12200
different P levels same genotypes	Metabolism	Amino acid metabolism	Lysine degradation	1	177	0.339579	0.594263	ko00310	Glyma.16G100200.1	K11420
different P levels same genotypes	Metabolism	Carbohydrate metabolism	Ascorbate and aldarate metabolism	1	195	0.366981	0.616527	ko00053	Glyma.07G013900.4	K00469
different P levels same genotypes	Metabolism	Nucleotide metabolism	Pyrimidine metabolism	2	627	0.431824	0.67489	ko00240	Glyma.19G193700.1;Glyma.19G193700.2	K01240+K01240
different P levels same genotypes	Genetic Information Processing	Translation	mRNA surveillance pathway	2	664	0.461174	0.67489	ko03015	Glyma.10G006800.1;Glyma.10G006800.2	K06269+K06269
different P levels same genotypes	Environmental Information Processing	Signal transduction	Plant hormone signal transduction	4	1499	0.466232	0.67489	ko04075	Glyma.05G235500.5;Glyma.05G235500.7;Glyma.07G051700.1;Glyma.10G007000.1	K13464+K13464+K14488+K14516
different P levels same genotypes	Metabolism	Carbohydrate metabolism	Galactose metabolism	1	275	0.47587	0.67489	ko00052	Glyma.05G217100.1	K01784
different P levels same genotypes	Metabolism	Amino acid metabolism	Arginine and proline metabolism	1	308	0.515229	0.67489	ko00330	Glyma.02G128000.2	K01611
different P levels same genotypes	Metabolism	Global and Overview	Biosynthesis of amino acids	3	1191	0.530461	0.67489	ko01230	Glyma.02G222400.1;Glyma.19G174300.1;Glyma.19G190100.2	K01623+K01778+K00873
different P levels same genotypes	Organismal Systems	Environmental adaptation	Circadian rhythm - plant	1	325	0.534359	0.67489	ko04712	Glyma.10G141400.2	K12120
different P levels same genotypes	Metabolism	Energy metabolism	Carbon fixation in photosynthetic organisms	1	330	0.539843	0.67489	ko00710	Glyma.02G222400.1	K01623
different P levels same genotypes	Metabolism	Lipid metabolism	Glycerolipid metabolism	1	336	0.54634	0.67489	ko00561	Glyma.17G221900.1	K03715
different P levels same genotypes	Cellular Processes	Transport and catabolism	Phagosome	1	387	0.598054	0.709829	ko04145	Glyma.16G013500.1	K00921
different P levels same genotypes	Environmental Information Processing	Signal transduction	Phosphatidylinositol signaling system	1	398	0.608425	0.709829	ko04070	Glyma.16G013500.1	K00921
different P levels same genotypes	Genetic Information Processing	Folding, sorting and degradation	Protein processing in endoplasmic reticulum	2	940	0.650096	0.737946	ko04141	Glyma.04G121000.2;Glyma.05G235400.1	K13989+K14011
different P levels same genotypes	Metabolism	Amino acid metabolism	Cysteine and methionine metabolism	1	505	0.696554	0.763209	ko00270	Glyma.02G128000.2	K01611
different P levels same genotypes	Genetic Information Processing	Translation	Ribosome	2	1048	0.708695	0.763209	ko03010	Glyma.03G189300.1;Glyma.11G048100.1	K02896+K02898
different P levels same genotypes	Metabolism	Biosynthesis of other secondary metabolites	Phenylpropanoid biosynthesis	1	627	0.773453	0.812125	ko00940	Glyma.14G201700.1	K00430
different P levels same genotypes	Metabolism	Nucleotide metabolism	Purine metabolism	1	813	0.855366	0.867457	ko00230	Glyma.19G190100.2	K00873
different P levels same genotypes	Organismal Systems	Environmental adaptation	Plant-pathogen interaction	1	849	0.867457	0.867457	ko04626	Glyma.13G035100.1	K13448
